# Supplementary material for: Targeting microtubules sensitizes drug resistant lung cancer cells to lysosomal pathway inhibitors
Source: PubMed Central journal article supplement (PMC7052910; doi:10.7150/thno.38729), 2020-02-03
Supplement: thnov10p2727s1.pdf [file thnov10p2727s1.pdf]

**A**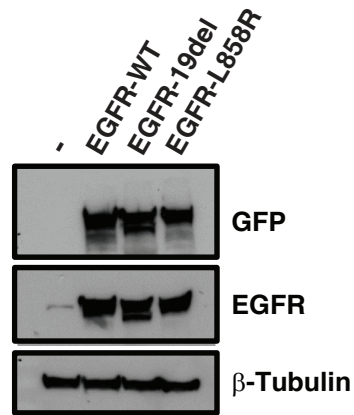**B**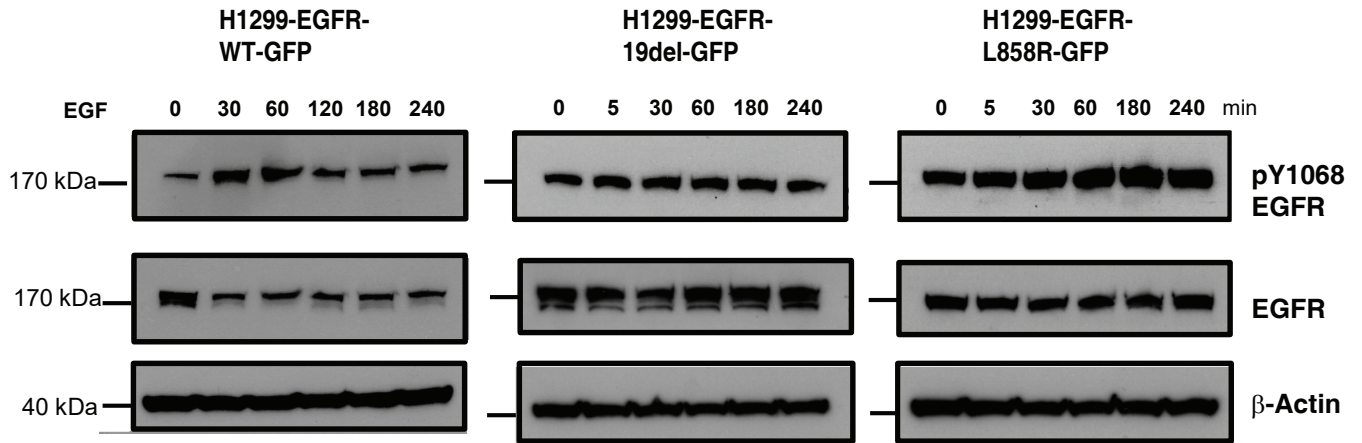**C**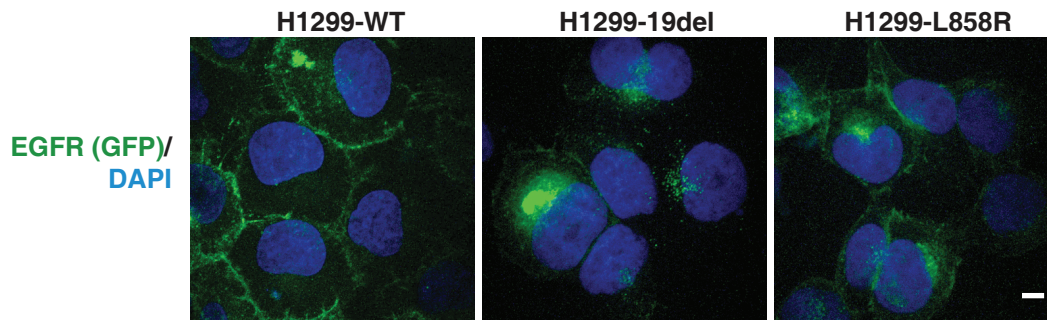

**Figure S1: Validation of H1299 cells stably transfected with EGFR.** **A**, Immunoblot analysis of GFP and total EGFR in stably transfected cells expressing EGFR WT, exon 19 deletion, and L858R mutation tagged with a C-terminal GFP, respectively.  $\beta$ -tubulin served as a loading control. **B**, EGFR degradation in stable cell lines: H1299 stable cells expressing EGFR-WT, EGFR-19del, and EGFR-L858R were serum starved with for 12-16 hours, treated with EGF (100 ng/ml), and harvested at various time points mentioned. Cell lysates collected were immunoblotted for pY1068-EGFR, total EGFR, and  $\beta$ -actin (loading control). **C**, EGFR WT, as well as 19-del- and L858R mutation- containing stably transfected cells were fixed with methanol and recorded using confocal microscopy. DAPI stains the nucleus. Scale bar: 10  $\mu$ m.

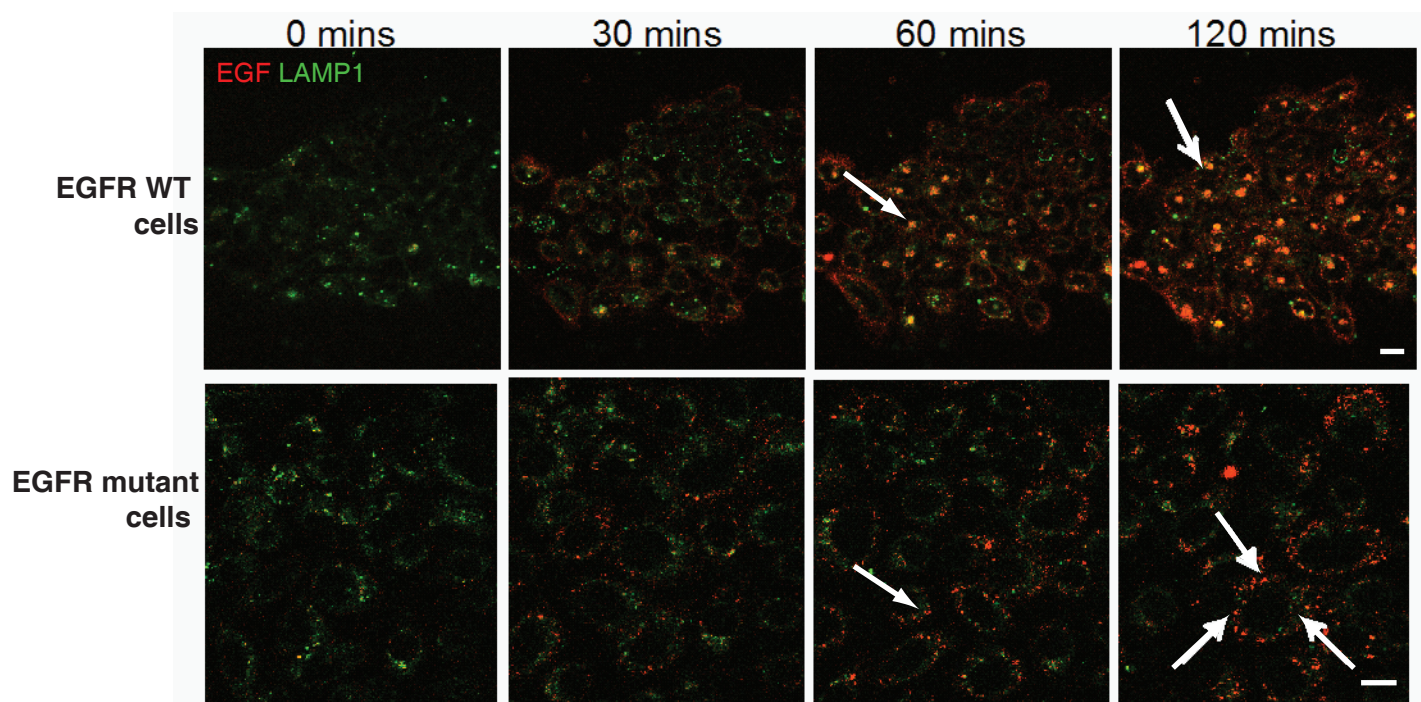

**Figure S2: Mutation status rather than EGFR levels cause delay in EGF maturation to lysosomes.** EGFR WT overexpressing cells (A431) and EGFR mutant cells (PC9) were serum starved overnight, treated with texas-red conjugated EGF, and fixed using paraformaldehyde at 0, 30, 60, and 120 minutes. Immunofluorescence of LAMP1 (green) was performed on the fixed cells. The white arrows in the top row indicate the colocalization of EGF with LAMP1, and in the bottom row indicate no-colocalization at 60 and 120 minutes. Scale bar: 10  $\mu$ m.

**A**

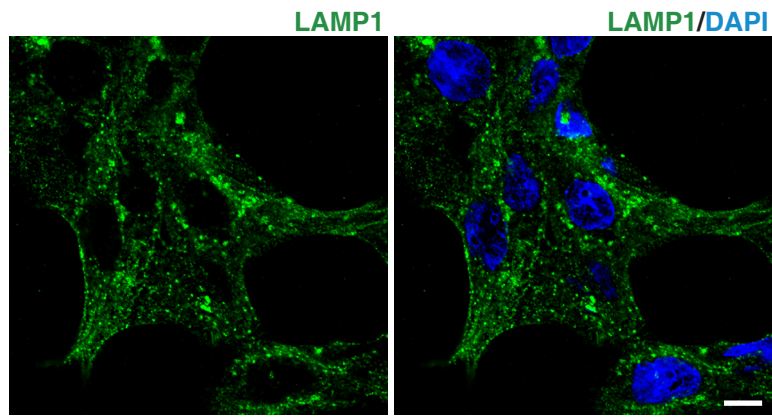

**B**

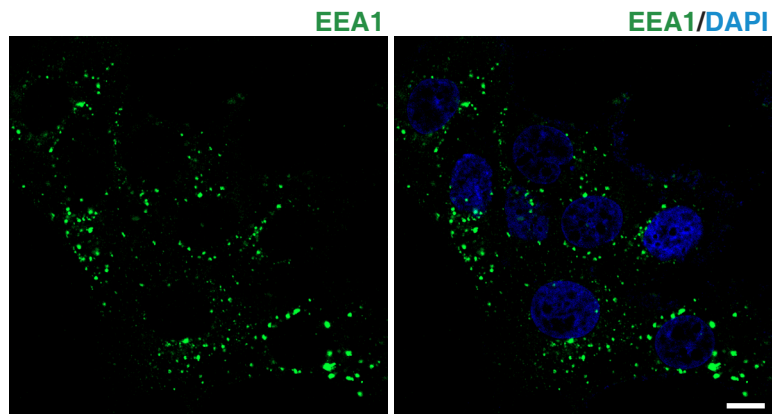

**Figure S3: Distribution of lysosomes and early endosomes in H1975 cells.**

Immunofluorescence staining of (A) LAMP1 (lysosomes) and (B) EEA1 (early endosomes) in H1975 cells, a TKI resistant NSCLC cell line that harbors L858R and T790M mutations. DAPI stain represents the nucleus. Scale bar: 10  $\mu\text{m}$ .

H1299

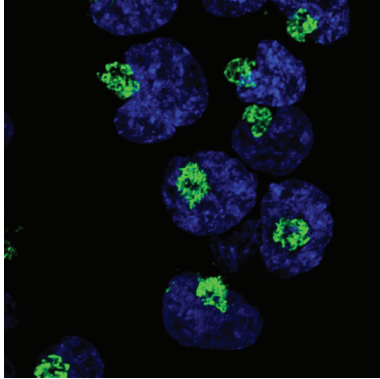

H1666

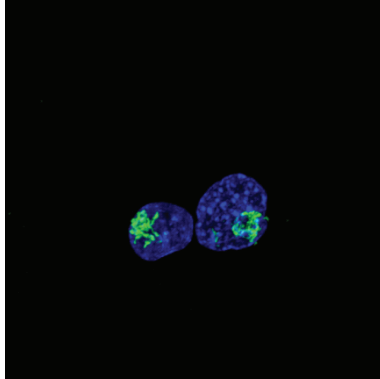

A431

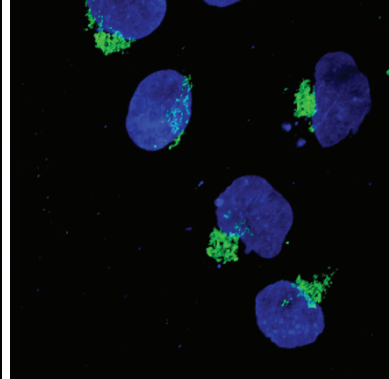

PC9

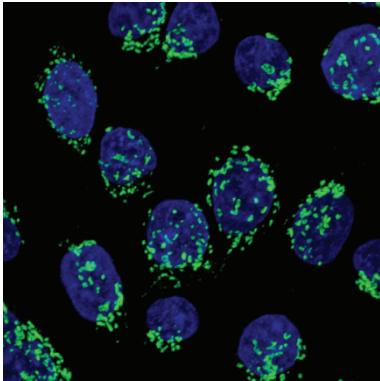

H1650

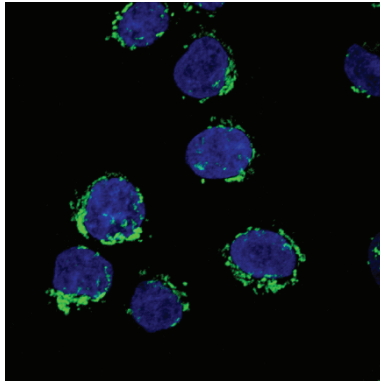

HCC827

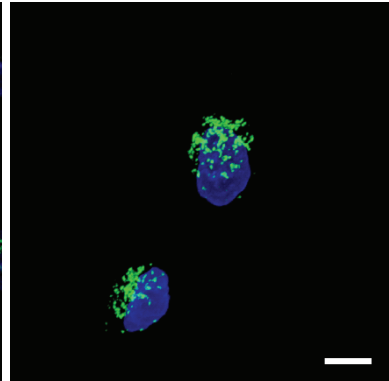

GM130/DAPI

**Figure S4: EGFR mutation causes fragmentation of Golgi network.** Immunofluorescence staining of GM130 protein (a cis-Golgi matrix protein) in NSCLC and A431 cells. NSCLC cells with EGFR WT (H1299 and H1666) and EGFR mutant (PC9, H1650, and HCC827) were used. A431 cells represent overexpression of EGFR WT. DAPI stain represents nucleus. Scale bar: 10  $\mu\text{m}$ .



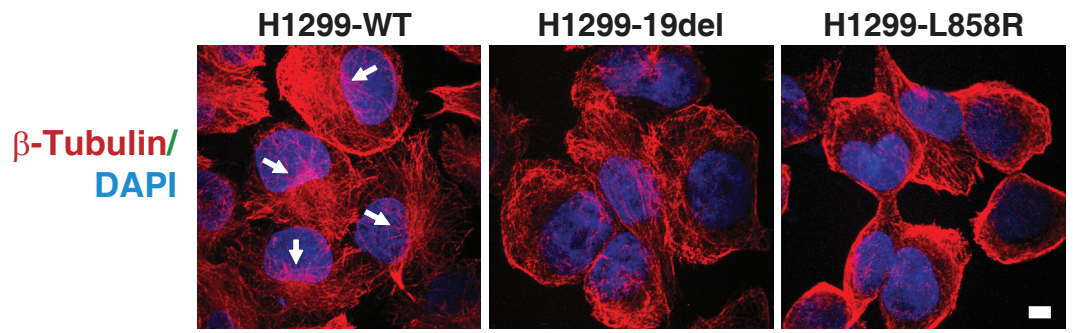

**Figure S5: EGFR mutants cause disruption of microtubule network in H1299 stable cells.**

EGFR WT, as well as 19-del- and L858R mutation- containing stably transfected cell lines (from supplementary figure 1C) were used for immunofluorescence of  $\beta$ -Tubulin (red). The white arrows point to the microtubule organizing centre (MTOC). DAPI stains the nucleus. Scale bar: 10  $\mu$ m.

**Table S1**

Microscopic appearance of LAMP1 in tumors samples of patients with sensitizing EGFR mutations and their response to EGFR tyrosine kinase inhibitors (Gefitinib)

| <b>Patient ID</b> | <b>Mutation type</b>   | <b>Microscopic appearance of LAMP1</b> | <b>Response to EGFR TKI</b> | <b>Duration of response</b> |
|-------------------|------------------------|----------------------------------------|-----------------------------|-----------------------------|
| CKL               | Ex 19 del 746-750      | Diffusely cytoplasmic                  | PR                          | 11 months (+)               |
| SLW               | Ex 19 del 746-750      | Diffusely cytoplasmic                  | PR                          | 12 months                   |
| YGW               | Ex 19 del 746-750      | Diffusely cytoplasmic                  | PR                          | 24 months (+)               |
| LC                | Ex 21 L858R            | Diffusely cytoplasmic                  | PR                          | 12 months                   |
| YCE               | Ex 21 L858R            | Diffusely cytoplasmic                  | SD                          | 4 months                    |
| LAB               | Ex 21 L858R            | Diffusely cytoplasmic                  | SD                          | 10 months                   |
| SS                | Ex 19 del 746-751 insA | Diffusely cytoplasmic (Weak)           | SD                          | 10 months                   |
| TMC               | L858R; V738F           | Diffusely cytoplasmic (Weak)           | SD                          | 6 months                    |
| NSS               | Wild-type              | Focal                                  | PD                          | -                           |
| KBM               | Wild-type              | Focal                                  | -                           | -                           |

PR- Partial response; SD- Stable disease; PD- Progressive disease.

+ denotes ongoing treatment and response
